# Supplementary material for: A new porous Co(ii)-metal–organic framework for high sorption selectivity and affinity to CO2 and efficient catalytic oxidation of benzyl alcohols to benzaldehydes
Source: Royal Society of Chemistry journal article supplement (doi:10.1039/d1ce00250c), 2021-01-01
Supplement: d1ce00250c1.pdf [file d1ce00250c1.pdf]

*Electronic Supplementary Information*

**New porous Co(II)-metal organic framework for high sorption selectivity and affinity for CO<sub>2</sub>, and efficient catalytic oxidation of benzyl alcohols to benzaldehydes †**

Yun-Long Wu,<sup>ab\*</sup> Rong-Rong Yang,<sup>a</sup> Guo-Ping Yang,<sup>b</sup> Yang-Tian Yan,<sup>a</sup> Xiao-Lei Su,<sup>a</sup> Xin-Hai He,<sup>a</sup> Yan-Yan Song,<sup>a</sup> Zheng-Sheng Ma<sup>b,II</sup> and Yao-Yu Wang<sup>b</sup>

<sup>a</sup>School of Materials Science & Engineering, Xi'an Polytechnic University, Xi'an 710048, P. R. China

<sup>b</sup>Key Laboratory of Synthetic and Natural Functional Molecule Chemistry of Ministry of Education, Shaanxi Key Laboratory of Physico-Inorganic Chemistry, College of Chemistry & Materials Science, and <sup>II</sup>School of Chemical Engineering, Northwest University, Xi'an 710127, P. R. China

\*Corresponding author: 20180717@xpu.edu.cn.

# Contents

## I Tables

1. Selected bonds lengths [ $\text{\AA}$ ] and angles [ $^\circ$ ] for **I**.
2. The hydrogen bonds for **I**.
3. Comparison of selectivity for  $\text{CO}_2$  at 298 K for **I'** and reported complexes.
4. Comparison of selectivity for  $\text{CO}_2$  at 273 K for **I'** and reported complexes.
5. Optimization of the oxidation reactions.

## II Figures

1. The chemical structure of the organic ligand  $\text{H}_4\text{L}$ .
2. The coordination models of carboxylate groups of the ligand.
3. The 1D porous networks contain dimethyl ammonium ions [ $\text{Me}_2\text{NH}_2^+$ ] in **I**.
4. Topology analysis for **I**.
5. Pore structure of **I** from Materials Studio 6.0.
6. PXRD patterns of **I**, **I'** and sample after gas sorption and catalytic reaction.
7. FT-IR spectra of **I**, **I'** and sample after catalytic reaction.
8. TGA curves of **I** and **I'**.
9.  $\text{N}_2$  adsorption isotherm for **I'** at 77 K.
10.  $\text{CH}_4$  and  $\text{CO}_2$  adsorption isotherms of **I'** at 273 K and 298 K with fitting by L-F model.
11.  $\text{CO}_2$  adsorption isotherms for **I'** fitted by Virial model.
12.  $^1\text{H}$  NMR spectra for the catalytic oxidation of benzyl alcohols into benzaldehydes.

## I Tables

**Table S1.** Selected bonds lengths [Å] and angles [°] for **I**.

| Complex <b>I</b>    |           |                     |           |
|---------------------|-----------|---------------------|-----------|
| Co(1)-O(1)#1        | 2.024(2)  | O(3)-Co(2)-N(1)#8   | 85.71(10) |
| Co(1)-O(1)          | 2.024(2)  | O(4)-Co(2)-O(5)     | 84.49(9)  |
| Co(1)-O(4)#2        | 2.155(2)  | O(7)#7-Co(2)-O(2)#6 | 98.86(10) |
| Co(1)-O(4)#3        | 2.155(2)  | O(7)#7-Co(2)-O(4)   | 94.38(10) |
| Co(1)-O(8)#4        | 2.063(2)  | O(7)#7-Co(2)-O(5)   | 83.33(10) |
| Co(1)-O(8)#5        | 2.063(2)  | O(7)#7-Co(2)-N(1)#8 | 88.21(10) |
| Co(2)-O(2)#6        | 2.141(2)  | N(1)#8-Co(2)-O(2)#6 | 92.40(10) |
| Co(2)-O(3)          | 2.072(2)  | N(1)#8-Co(2)-O(4)   | 171.31(9) |
| Co(2)-O(4)          | 2.160(2)  | N(1)#8-Co(2)-O(5)   | 87.58(10) |
| Co(2)-O(5)          | 2.162(2)  | C(22)-N(2)-C(23)    | 112.6(13) |
| Co(2)-O(7)#7        | 2.089(2)  | C(22)-N(2)-C(24)    | 126.5(14) |
| Co(2)-N(1)#8        | 2.100(3)  | C(24)-N(2)-C(23)    | 116.6(12) |
| N(2)-C(22)          | 1.354(15) | O(10)-C(22)-N(2)    | 111.6(15) |
| N(2)-C(23)          | 1.504(17) | O(10)-C(22)-H(22)   | 124.2     |
| N(2)-C(24)          | 1.359(14) | N(2)-C(22)-H(22)    | 124.2     |
| C(22)-H(22)         | 0.9500    | N(2)-C(23)-H(23A)   | 109.5     |
| C(23)-H(23A)        | 0.9800    | N(2)-C(23)-H(23B)   | 109.5     |
| C(23)-H(23B)        | 0.9800    | N(2)-C(23)-H(23C)   | 109.5     |
| C(23)-H(23C)        | 0.9800    | H(24A)-C(24)-H(24B) | 109.5     |
| C(24)-H(24A)        | 0.9800    | H(24A)-C(24)-H(24C) | 109.5     |
| C(24)-H(24B)        | 0.9800    | H(24B)-C(24)-H(24C) | 109.5     |
| C(24)-H(24C)        | 0.9800    | H(3A)-N(3)-H(3B)    | 107.8     |
| N(3)-H(3A)          | 0.9100    | C(25)-N(3)-H(3A)    | 109.1     |
| N(3)-H(3B)          | 0.9100    | C(25)-N(3)-H(3B)    | 109.1     |
| N(3)-C(25)          | 1.364(10) | C(25)-N(3)-C(26)    | 112.6(9)  |
| N(3)-C(26)          | 1.623(13) | C(26)-N(3)-H(3A)    | 109.1     |
| C(25)-H(25A)        | 0.9800    | C(26)-N(3)-H(3B)    | 109.1     |
| C(25)-H(25B)        | 0.9800    | H(23A)-C(23)-H(23B) | 109.5     |
| C(25)-H(25C)        | 0.9800    | H(23A)-C(23)-H(23C) | 109.5     |
| C(26)-H(26A)        | 0.9800    | H(23B)-C(23)-H(23C) | 109.5     |
| C(26)-H(26B)        | 0.9800    | N(2)-C(22)-H(22)    | 124.2     |
| C(26)-H(26C)        | 0.9800    | N(2)-C(23)-H(23A)   | 109.5     |
| O(1)#1-Co(1)-O(1)   | 180.0     | N(2)-C(23)-H(23B)   | 109.5     |
| O(1)-Co(1)-O(4)#2   | 84.89(10) | N(2)-C(23)-H(23C)   | 109.5     |
| O(1)-Co(1)-O(4)#3   | 95.11(10) | H(23A)-C(23)-H(23B) | 109.5     |
| O(1)#1-Co(1)-O(4)#2 | 95.11(10) | H(23A)-C(23)-H(23C) | 109.5     |

|                     |            |                     |       |
|---------------------|------------|---------------------|-------|
| O(1)#1-Co(1)-O(4)#3 | 84.89(10)  | H(23B)-C(23)-H(23C) | 109.5 |
| O(1)#1-Co(1)-O(8)#5 | 89.54(10)  | N(2)-C(24)-H(24A)   | 109.5 |
| O(1)#1-Co(1)-O(8)#4 | 90.46(10)  | N(2)-C(24)-H(24B)   | 109.5 |
| O(1)-Co(1)-O(8)#4   | 89.54(10)  | N(2)-C(24)-H(24C)   | 109.5 |
| O(1)-Co(1)-O(8)#5   | 90.46(10)  | N(3)-C(25)-H(25A)   | 109.5 |
| O(4)#2-Co(1)-O(4)#3 | 180.0      | N(3)-C(25)-H(25B)   | 109.5 |
| O(8)#4-Co(1)-O(4)#3 | 85.91(9)   | N(3)-C(25)-H(25C)   | 109.5 |
| O(8)#5-Co(1)-O(4)#2 | 85.91(9)   | H(25A)-C(25)-H(25B) | 109.5 |
| O(8)#4-Co(1)-O(4)#2 | 94.09(9)   | H(25A)-C(25)-H(25C) | 109.5 |
| O(8)#5-Co(1)-O(4)#3 | 94.09(9)   | H(25B)-C(25)-H(25C) | 109.5 |
| O(8)#5-Co(1)-O(8)#4 | 180.00(12) | N(3)-C(26)-H(26A)   | 109.5 |
| O(2)#6-Co(2)-O(4)   | 95.39(9)   | N(3)-C(26)-H(26B)   | 109.5 |
| O(2)#6-Co(2)-O(5)   | 177.81(10) | N(3)-C(26)-H(26C)   | 109.5 |
| O(3)-Co(2)-O(2)#6   | 86.90(10)  | H(26A)-C(26)-H(26B) | 109.5 |
| O(3)-Co(2)-O(4)     | 90.86(9)   | H(26A)-C(26)-H(26C) | 109.5 |
| O(3)-Co(2)-O(5)     | 90.92(10)  | H(26B)-C(26)-H(26C) | 109.5 |
| O(3)-Co(2)-O(7)#7   | 171.80(9)  |                     |       |

Symmetry Codes: #1-x+1, -y+2, -z+2; #2: -x+3/2, y+1/2, -z+3/2; #3: x-1/2, -y+3/2, z+1/2; #4: x, y, z+1; #5: -x+1, -y+2, -z+1; #6: -x+3/2, y-1/2, -z+3/2; #7: -x+3/2, y-1/2, -z+1/2; #8: -x+1, -y+1, -z+1.

**Table S2.** Hydrogen bonds for **1**.

| D-H...A               | d(D-H)    | d(H...A) | d(D...A)  | <(DHA) |
|-----------------------|-----------|----------|-----------|--------|
| O(4)-H(4A)...O(6)     | 0.815(19) | 1.84(2)  | 2.621(3)  | 160(4) |
| O(4)-H(4B)...O(9)     | 0.826(19) | 1.96(2)  | 2.747(4)  | 160(4) |
| C(22)-H(22)...O(9)    | 0.95      | 2.32     | 3.145(16) | 144.3  |
| C(24)-H(24A)...O(2)#2 | 0.98      | 2.53     | 3.314(14) | 136.9  |
| N(3)-H(3A)...O(6)     | 0.91      | 1.85     | 2.714(6)  | 158.5  |
| N(3)-H(3B)...O(10)    | 0.91      | 1.70     | 2.578(14) | 162.6  |

Symmetry Codes: -x+3/2, y+1/2, -z+3/2

**Table S3.** Comparison of selectivity for CO<sub>2</sub> over CH<sub>4</sub> at 298 K for **I'** and reported complexes.

| Complexes                                                                                                         | Selectivity | References       |
|-------------------------------------------------------------------------------------------------------------------|-------------|------------------|
| MIL-53(AI)                                                                                                        | 2.3         | 1                |
| MOF-205-OBn                                                                                                       | 2.7         | 2                |
| ZJNU-63                                                                                                           | 3.5         | 3                |
| JLU-Liu18                                                                                                         | 4.5         | 4                |
| MFM-130a                                                                                                          | 7.1         | 5                |
| JLU-Liu46                                                                                                         | 9.8         | 6                |
| <b>(Me<sub>2</sub>NH<sub>2</sub>)<sub>2</sub>[Co<sub>3</sub>(L)<sub>2</sub>(H<sub>2</sub>O)<sub>2</sub>]·2DMF</b> | <b>12.8</b> | <b>This work</b> |
| [Ni(btzip)(H <sub>2</sub> btzip)]·2DMF·2H <sub>2</sub> O                                                          | 13.9        | 7                |
| {[PbZn(L) <sub>2</sub> ]·DMA·H <sub>2</sub> O} <sub>n</sub>                                                       | 16.2        | 8                |

**Table S4.** Comparison of selectivity for CO<sub>2</sub> over CH<sub>4</sub> at 273 K for **I'** and reported complexes.

| Complexes                                                                                                         | Selectivity | References       |
|-------------------------------------------------------------------------------------------------------------------|-------------|------------------|
| ZJNU-63                                                                                                           | 4.2         | 3                |
| ZIF-95                                                                                                            | 4.3         | 9                |
| ZIF-100                                                                                                           | 5.9         | 9                |
| HKUST-1                                                                                                           | 7.1         | 10               |
| MFM-130a                                                                                                          | 9.4         | 5                |
| Cu <sub>2</sub> (pbpta)                                                                                           | 12          | 11               |
| ZJU-16                                                                                                            | 38          | 12               |
| {[PbZn(L) <sub>2</sub> ]·DMA·H <sub>2</sub> O} <sub>n</sub>                                                       | 41.3        | 9                |
| <b>(Me<sub>2</sub>NH<sub>2</sub>)<sub>2</sub>[Co<sub>3</sub>(L)<sub>2</sub>(H<sub>2</sub>O)<sub>2</sub>]·2DMF</b> | <b>112</b>  | <b>This work</b> |

### References

- (1) Z. Xiang, X. Peng, X. Cheng, X. Li and D. Cao, *J. Phys. Chem. C.*, 2011, **115**, 19864–19871.
- (2) J. Sim, H. Yim, N. Ko, S. B. Choi, Y. Oh, H. J. Park, S. Park and J. Kim, *Dalton Trans.*, 2014, **43**, 18017–18024.
- (3) D. Bai, Y. Wang, M. He, X. Gao and Y. He, *Inorg. Chem. Front.*, 2018, **5**, 2227-2237.
- (4) W.-Q. Zhang, R.-D. Wang, Z.-B. Wu, Y.-F. Kang, Y.-P. Fan, X.-Q. Liang, P. Liu and Y.-Y. Wang, *Inorg. Chem.*, 2018, **57**, 1455-1463.
- (5) Y. Yan, M. Juríček, F.-X. Coudert, N. A. Vermeulen, S. Grunder, A. Dailly, W. Lewis, A. J. Blake, J. F. Stoddart and M. J. Schröder, *J. Am. Chem. Soc.*, 2016, **138**, 3371-3381.
- (6) B. Liu, S. Yao, X. Liu, X. Li, R. Krishna, G. Li, Q. Huo and Y. Liu, *ACS Appl. Mater Interfaces*, 2017, **9**, 32820-32828.
- (7) Y.-Z. Li, H.-H. Yang, H.-Y. Wang, L. Hou, Y.-Y. Wang and Z. Zhu, *Chem. Eur. J.*, 2018, **24**, 865–871.
- (8) J. Liu, G.-P. Yang, J. Jin, D. Wu, L.-F. Ma, Y.-Y. Wang, *Chem. Commun.*, 2020, **56**, 2395-2398.
- (9) B. Wang, A. P. Côté, H. Furukawa, M. O’Keeffe and O. M. Yaghi, *Nature.*, 2008, **453**, 207-212.
- (10) K.-S. Lin, A. K. Adhikari, C.-N. Ku, C.-L. Chiang and H. Kuo, *International Journal of Hydrogen Energy*, **2012**, **37**, 13865-13871.
- (11) G. Verma, S. Kumar, T. Pham, Z. Niu, L. Wojtas, J. A. Perman, Y.-S. Ch and S. Ma, *Cryst. Growth Des.*, 2017, **17**, 2711-2717.
- (12) K.-S. Lin, A. K. Adhikari, C.-N. Ku, C.-L. Chiang and H. Kuo, *International Journal of*

**Table S5.** Optimization of the oxidation reactions<sup>a</sup>

| Entry           | Solvent                         | Cat (mol %)                                | Additive( mol %) | Time (h) | <sup>b</sup> Yield (%) |
|-----------------|---------------------------------|--------------------------------------------|------------------|----------|------------------------|
| 1               | toluene                         | I <sup>+</sup> (3 mol %)                   | proline (40%)    | 3h       | 21                     |
| 2               | 2-propanol                      | I <sup>+</sup> (3 mol %)                   | proline (40%)    | 3h       | NR                     |
| 3               | H <sub>2</sub> O                | I <sup>+</sup> (3 mol %)                   | proline (40%)    | 3h       | <5                     |
| 4               | Acetic acid                     | I <sup>+</sup> (3 mol %)                   | proline (40%)    | 3h       | <5                     |
| 5               | DMSO                            | I <sup>+</sup> (3 mol %)                   | proline (40%)    | 3h       | 37                     |
| 6               | CH <sub>3</sub> CN              | I <sup>+</sup> (3 mol %)                   | proline (40%)    | 3h       | 95                     |
| 7               | THF                             | I <sup>+</sup> (3 mol %)                   | proline (40%)    | 3h       | NR                     |
| 8               | CH <sub>2</sub> Cl <sub>2</sub> | I <sup>+</sup> (3 mol %)                   | proline (40%)    | 3h       | Trace                  |
| 9               | DMF                             | I <sup>+</sup> (3 mol %)                   | proline (40%)    | 3h       | 47                     |
| 10 <sup>c</sup> | CH <sub>3</sub> CN              | I <sup>+</sup> (3 mol %)                   | -                | 3h       | 41 <sup>c</sup>        |
| 11              | CH <sub>3</sub> CN              | I <sup>+</sup> (3 mol %)                   | proline (5%)     | 3h       | 52                     |
| 12              | CH <sub>3</sub> CN              | I <sup>+</sup> (3 mol %)                   | proline (15%)    | 3h       | 68                     |
| 13              | CH <sub>3</sub> CN              | I <sup>+</sup> (3 mol %)                   | proline (30%)    | 3h       | 80                     |
| 14              | CH <sub>3</sub> CN              | I <sup>+</sup> (3 mol %)                   | proline (30%)    | 3h       | 89                     |
| 15              | CH <sub>3</sub> CN              | -                                          | proline (40%)    | 3h       | NR                     |
| 16              | CH <sub>3</sub> CN              | I <sup>+</sup> (1 mol %)                   | proline (40%)    | 3h       | 83                     |
| 17              | CH <sub>3</sub> CN              | I <sup>+</sup> (2 mol %)                   | proline (40%)    | 3h       | 89                     |
| 18              | CH <sub>3</sub> CN              | I <sup>+</sup> (5 mol %)                   | proline (40%)    | 3h       | 95                     |
| 19              | CH <sub>3</sub> CN              | Co(NO <sub>3</sub> ) <sub>2</sub> (3mol %) | proline (40%)    | 3h       | Trace                  |
| 20              | CH <sub>3</sub> CN              | Co(OAc) <sub>2</sub> (3mol %)              | proline (40%)    | 3h       | Trace                  |

<sup>a</sup>Reaction conditions: **1a** (0.2 mmol), I<sup>+</sup>(3 mol %), solvent (2 mL), proline (x mol %), for 3 h.

<sup>b</sup>Isolated yield; <sup>c</sup>The by-product is benzoic acid, yield 13%, conversion 54%; no reaction (NR).

## II Figures

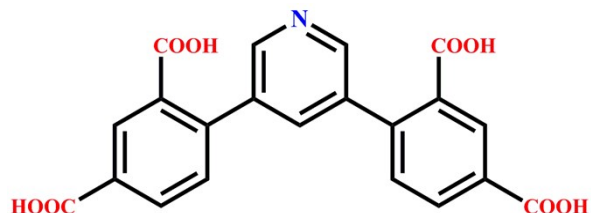

**Fig. S1** The chemical structure of the v-shaped 3,5-di(2,4-dicarboxylphenyl)pyridine organic ligand H<sub>4</sub>L.

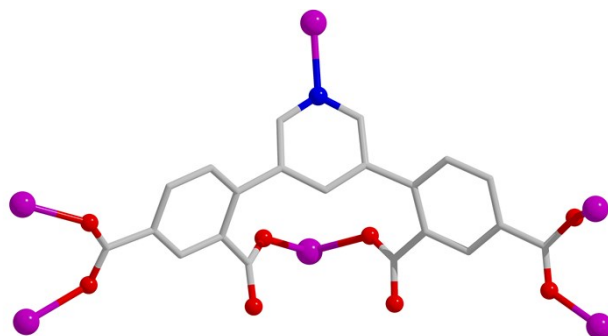

**Fig. S2** The coordination model of carboxylic groups of the ligand in **I**:  $\eta^2\mu_2\chi^2$  and  $\eta^1\mu_1\chi^1$  ( $\eta$ -number of coordination bonds donated from the O atom of carboxylic groups from ligand;  $\mu$ -number of metal centers bond the O atom of carboxylic groups from ligand;  $\chi$ -number of coordination bonds).

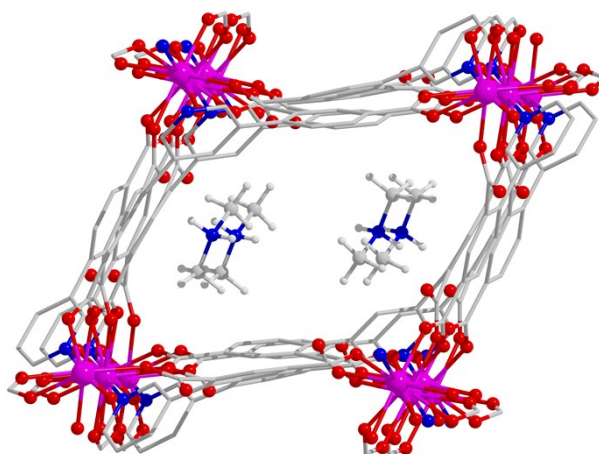

**Fig.S3** The 1D porous network contains dimethyl ammonium ions  $[\text{Me}_2\text{NH}_2^+]$  of **I**.

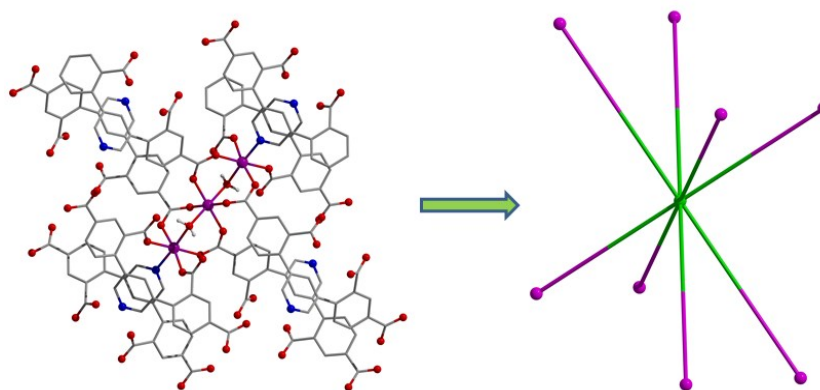

(a)

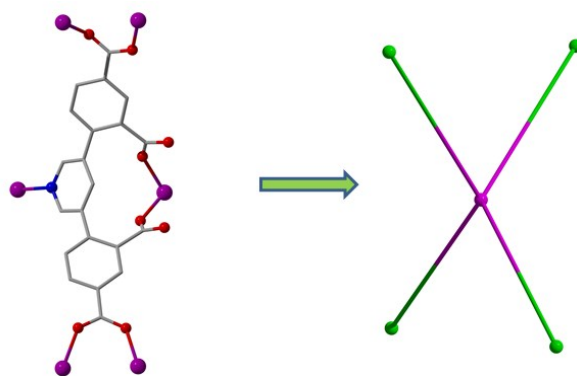

(b)

**Fig. S4** Topology analysis for **I**: (a) simplified for the trinuclear SBUs  $[\text{Co}_3(\text{COO})_4(\text{H}_2\text{O})_2\text{N}_2]$  as 8-connected nodes; (b) simplified for the organic ligand  $\text{L}^{4-}$  as 4-connected nodes.

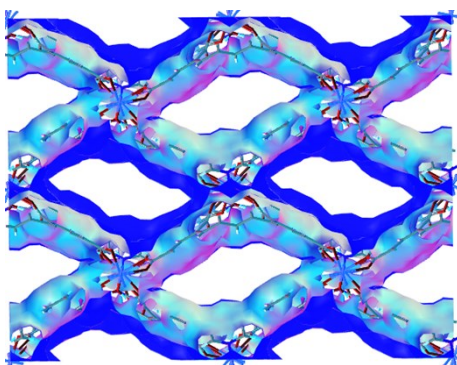

**Fig. S5** Pore structure of **I** from Materials Studio 6.0.

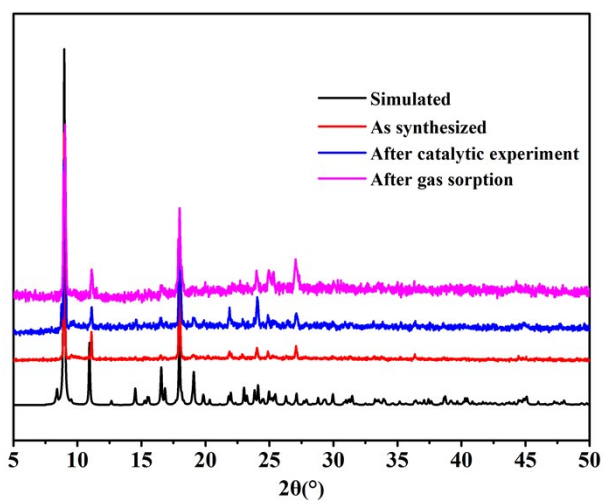

**Fig. S6** PXRD patterns of **I** (simulated from crystal data; as synthesized; after catalytic and gas sorption experiments).



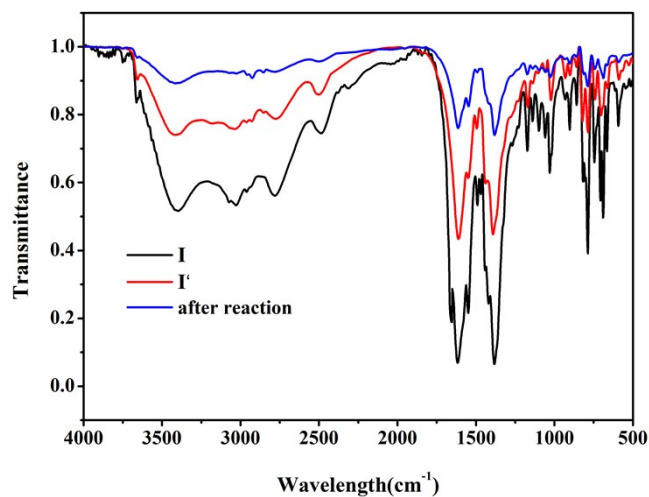

**Fig. S7** The FT-IR spectra of complexes **I**, **I'** and the sample after catalytic reaction. The characteristic C=O vibration at 1663  $\text{cm}^{-1}$  of DMF in **I** is absent in **I'**, indicating the complete removal of DMF.

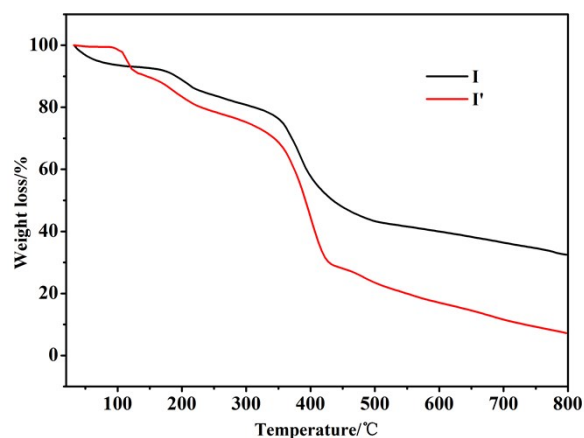

**Fig. S8** TGA curves of the as-synthesized **I** and desolvated samples **I'**.

### Gas adsorption test

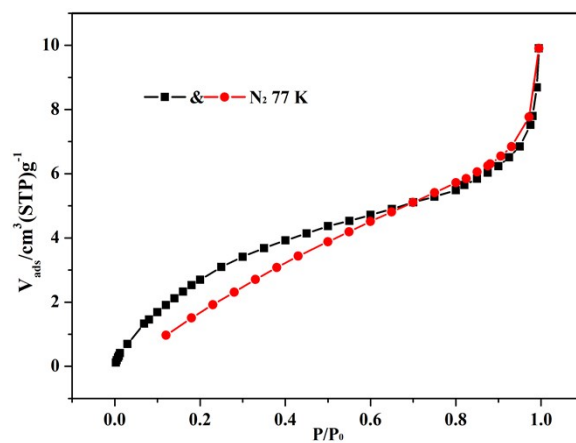

**Fig. S9**  $\text{N}_2$  adsorption isotherm for **I'** at 77 K.

### IAST adsorption selectivity calculation:

The experimental isotherm data for pure CO<sub>2</sub> and CH<sub>4</sub> (measured at 273 and 298 K) were fitted using a Langmuir-Freundlich (L-F) model:

$$q = \frac{a * b * p^c}{1 + b * p^c}$$

Where  $q$  and  $p$  are adsorbed amounts and pressures of component  $i$ , respectively. The adsorption selectivities for binary mixtures of CO<sub>2</sub>/CH<sub>4</sub> at 273 and 298 K, defined by

$$S_{ads} = (q_1 / q_2) / (p_1 / p_2)$$

Where  $q_i$  is the amount of  $i$  adsorbed and  $p_i$  is the partial pressure of  $i$  in the mixture.

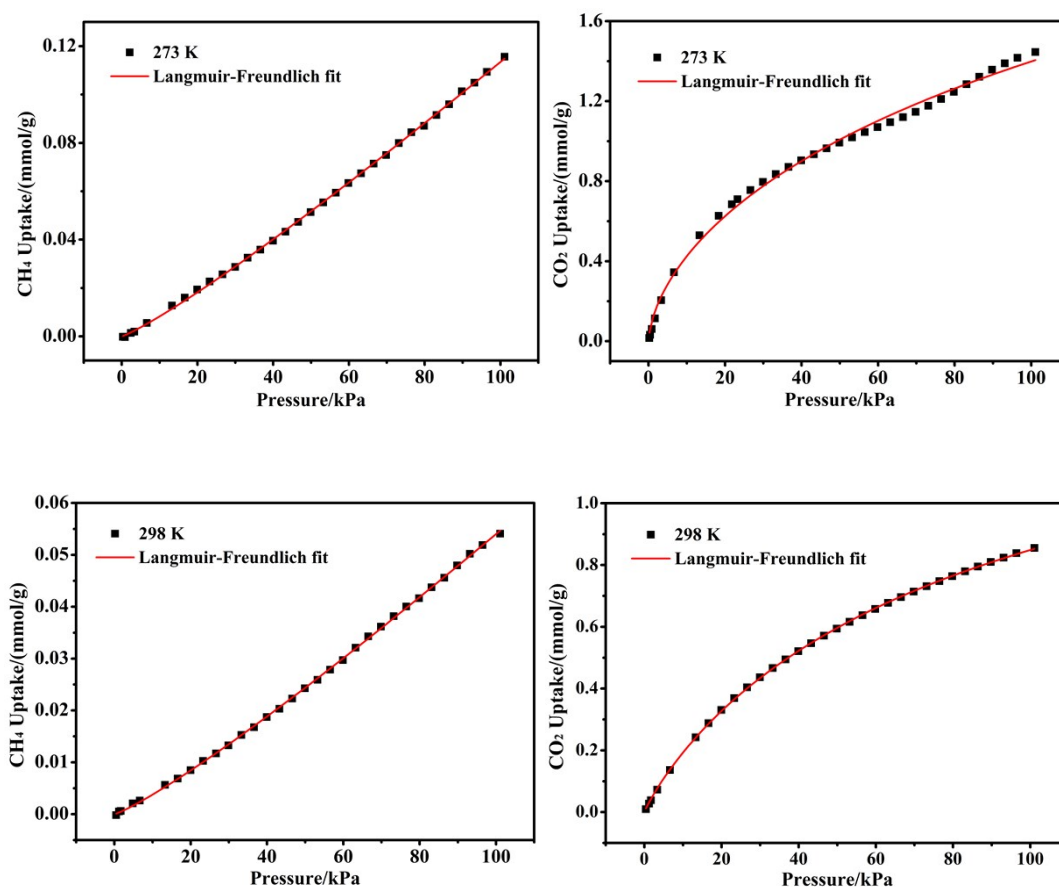

**Fig. S10** CH<sub>4</sub> adsorption isotherms of **I'** at 273 K with fitting by L-F model:  $a = 8.2443$ ,  $b = 7.189 \times 10^{-5}$ ,  $c = 1.14407$ ,  $\chi^2 = 4.18 \times 10^{-7}$ ,  $R^2 = 0.99969$ ; CO<sub>2</sub> adsorption isotherms of **I'** at 273 K with fitting by L-F model:  $a = 5.01081$ ,  $b = 0.02217$ ,  $c = 0.62107$ ,  $\chi^2 = 8.01 \times 10^{-4}$ ,  $R^2 = 0.99559$ ; CH<sub>4</sub> adsorption isotherms of **I'** at 298 K with fitting by L-F model:  $a = 2.93833$ ,  $b = 8.84887 \times 10^{-5}$ ,  $c = 1.16282$ ,  $\chi^2 = 7.89072 \times 10^{-8}$ ,  $R^2 = 0.99973$ ; CO<sub>2</sub> adsorption isotherms of **I'** at 298 K with fitting by L-F model:  $a = 1.64397$ ,  $b = 0.01654$ ,  $c = 0.90479$ ,  $\chi^2 = 6.5063 \times 10^{-6}$ ,  $R^2 = 0.99991$ .

### Calculation of sorption heat for CO<sub>2</sub> uptake using Virial 2 model

$$\ln P = \ln N + 1/T \sum_{i=0}^m aiN^i + \sum_{i=0}^n biN^i Q_{st} = -R \sum_{i=0}^m aiN^i$$

The above equation was applied to fit the combined CO<sub>2</sub> isotherm data for **I'** at 273 and 298 K, where  $P$  is the pressure,  $N$  is the adsorbed amount,  $T$  is the temperature,  $ai$  and  $bi$  are virial coefficients, and  $m$  and  $n$  are the number of coefficients used to describe the isotherms.  $Q_{st}$  is the coverage-dependent enthalpy of adsorption and  $R$  is the universal gas constant.

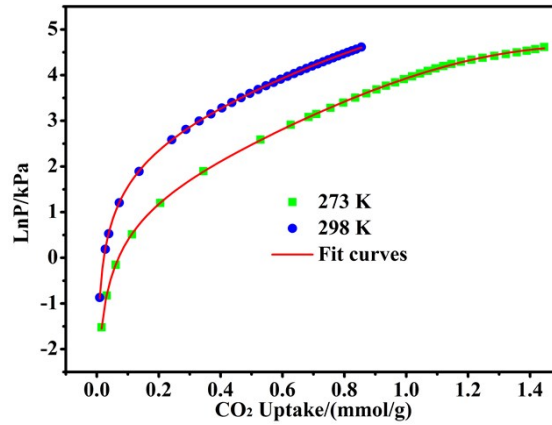

**Fig. S11** CO<sub>2</sub> adsorption isotherms for **I'** fitted by Virial model. Fitting results:  $a_0 = -3791.44891$ ;  $a_1 = -295.74484$ ;  $a_2 = 886.17577$ ;  $a_3 = 278.32264$ ;  $a_4 = -345.5531$ ;  $a_5 = 81.96688$ ;  $b_0 = 16.49525$ ;  $b_1 = 1.83753$ ;  $b_2 = -2.73299$ ;  $\chi^2 = 1.26359 \times 10^{-4}$ ;  $R^2 = 0.99994$ .

### <sup>1</sup>H NMR spectra of compound **2a**

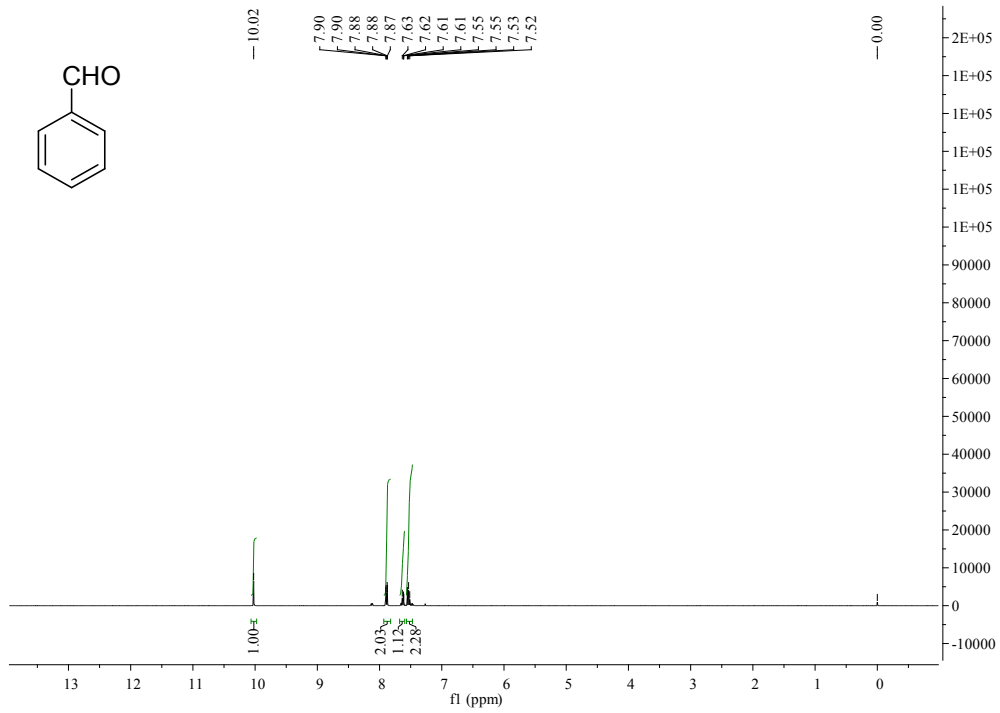

### <sup>1</sup>H NMR spectra of compound **2b**

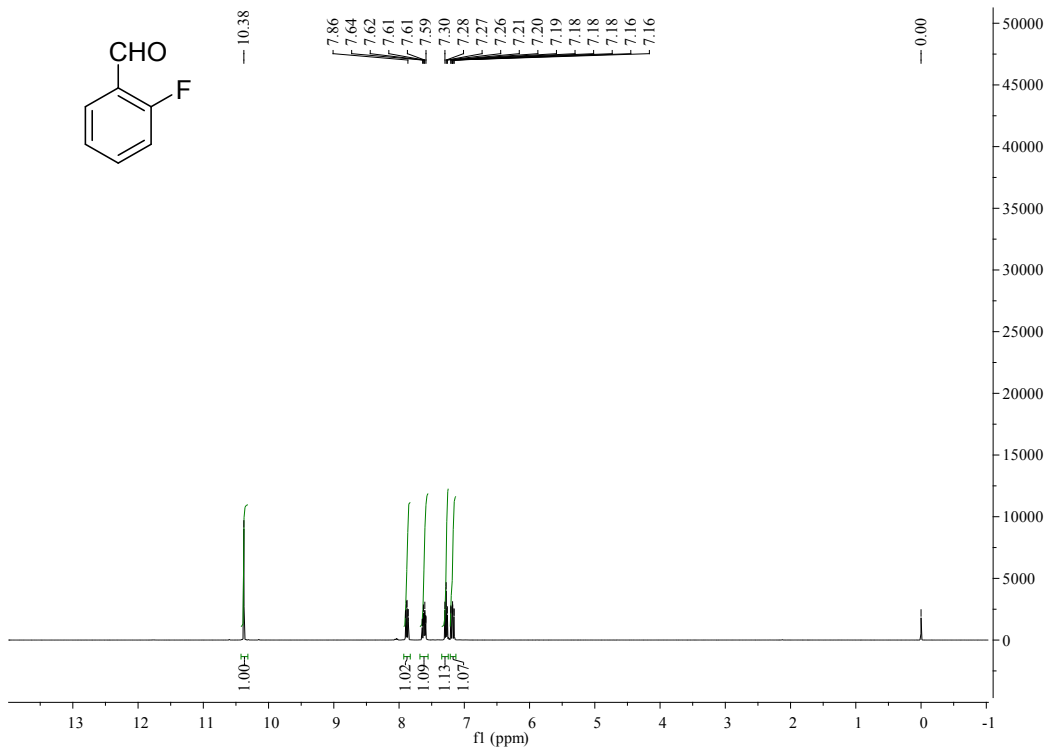

<sup>1</sup>H NMR spectra of compound 2c

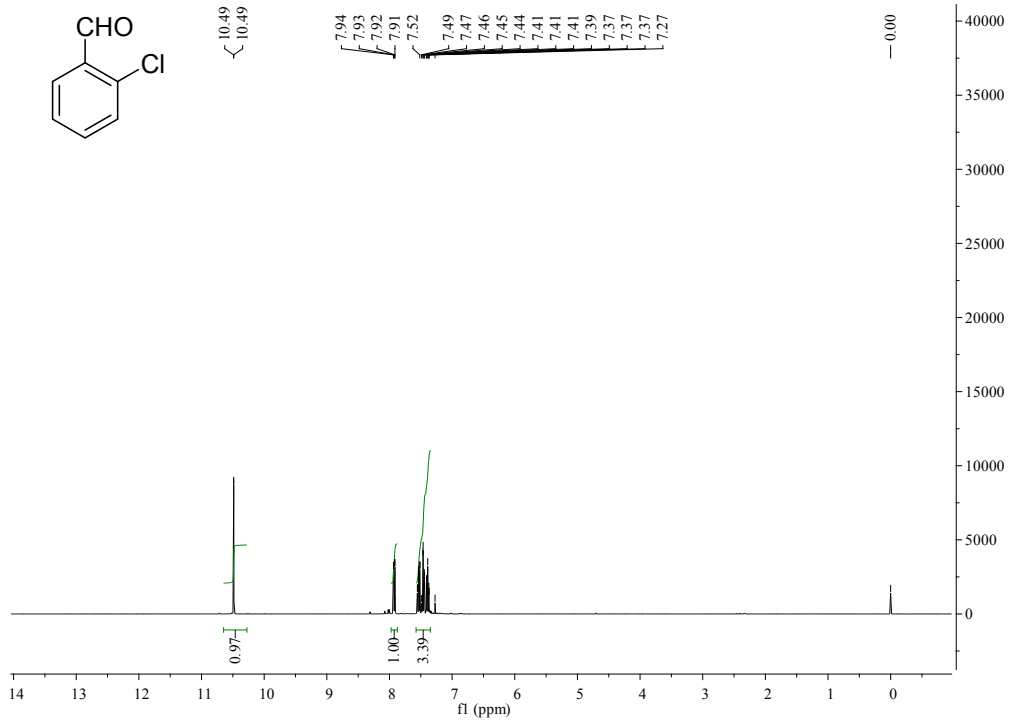

<sup>1</sup>H NMR spectra of compound 2d

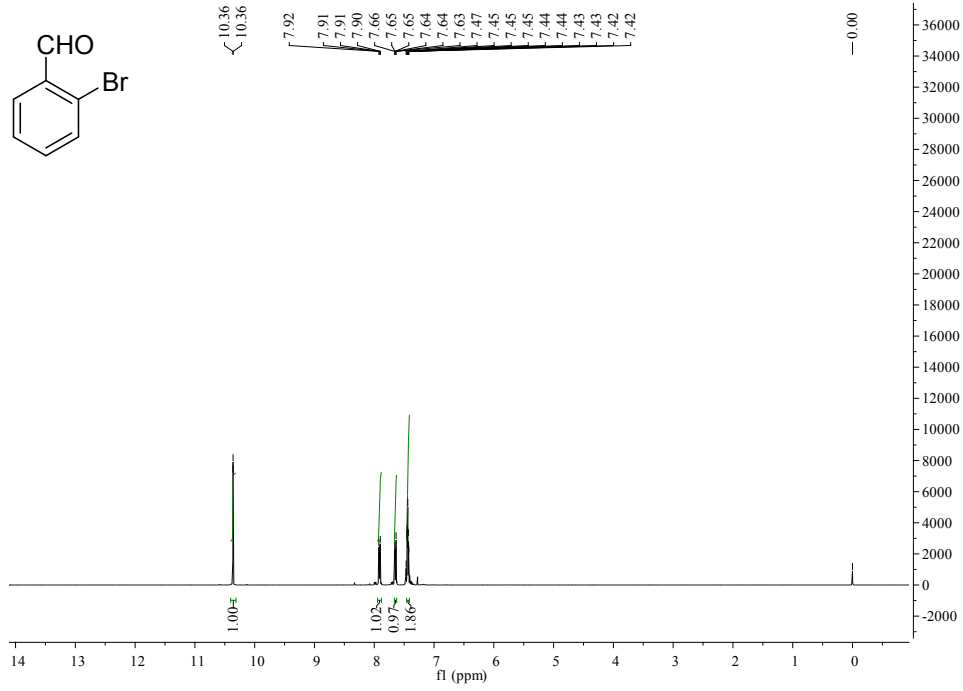

<sup>1</sup>H NMR spectra of compound **2e**

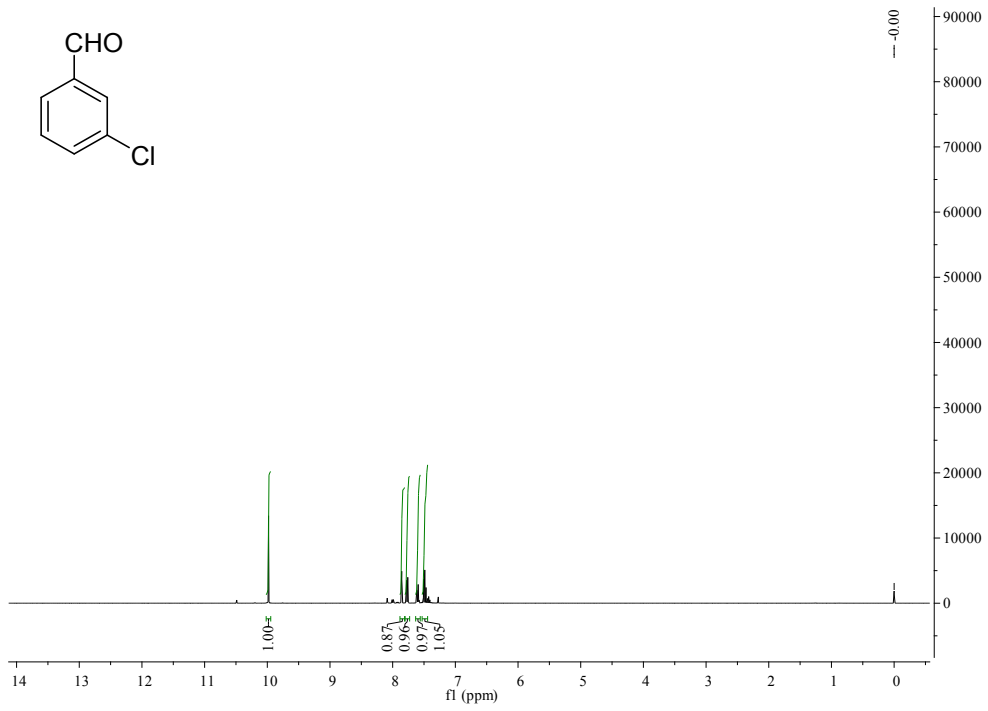

<sup>1</sup>H NMR spectra of compound **2f**

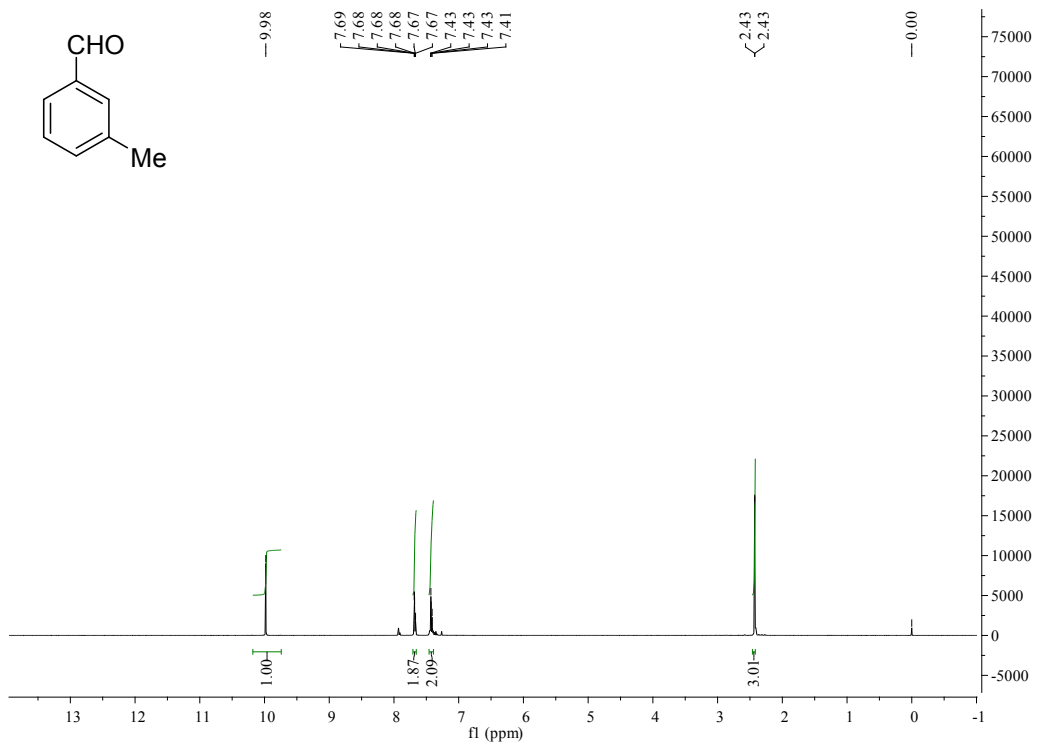

<sup>1</sup>H NMR spectra of compound **2g**

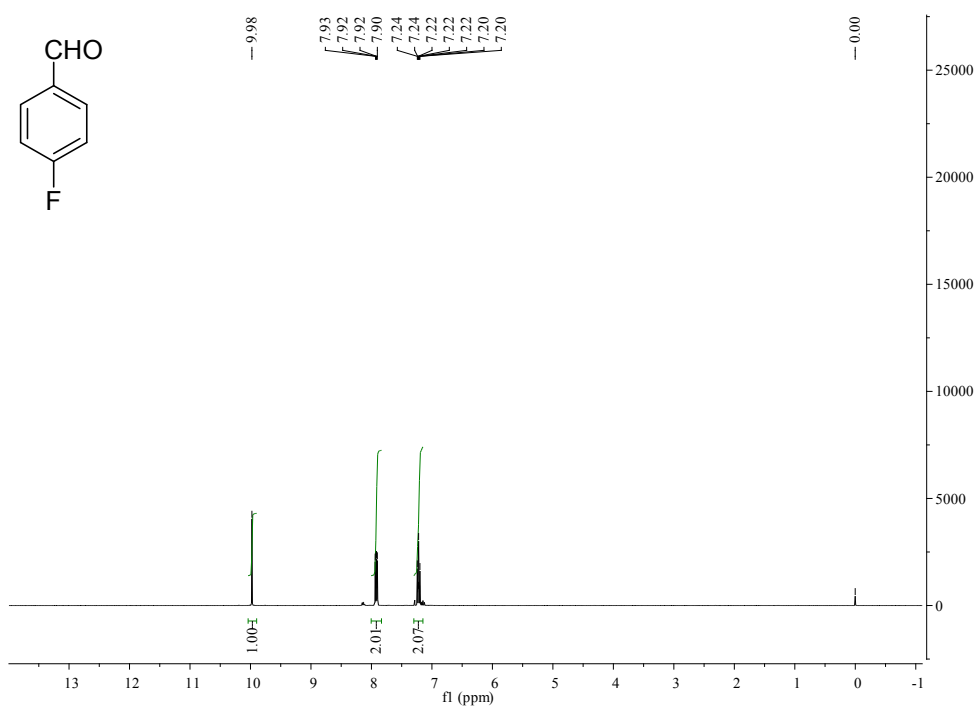

<sup>1</sup>H NMR spectra of compound **2h**

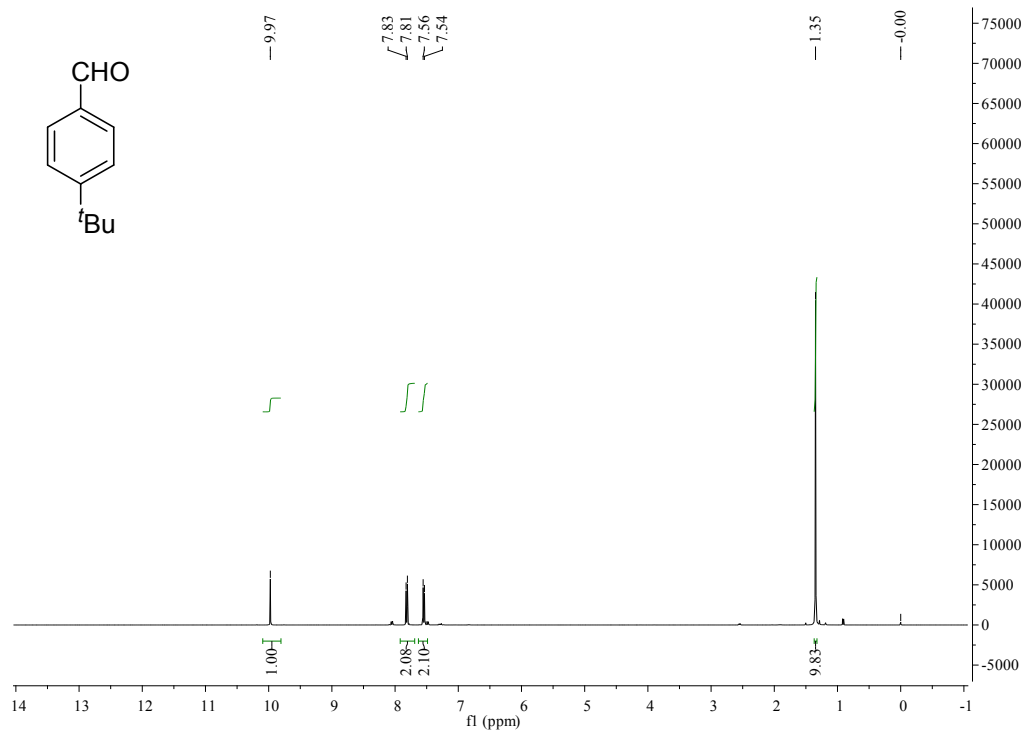

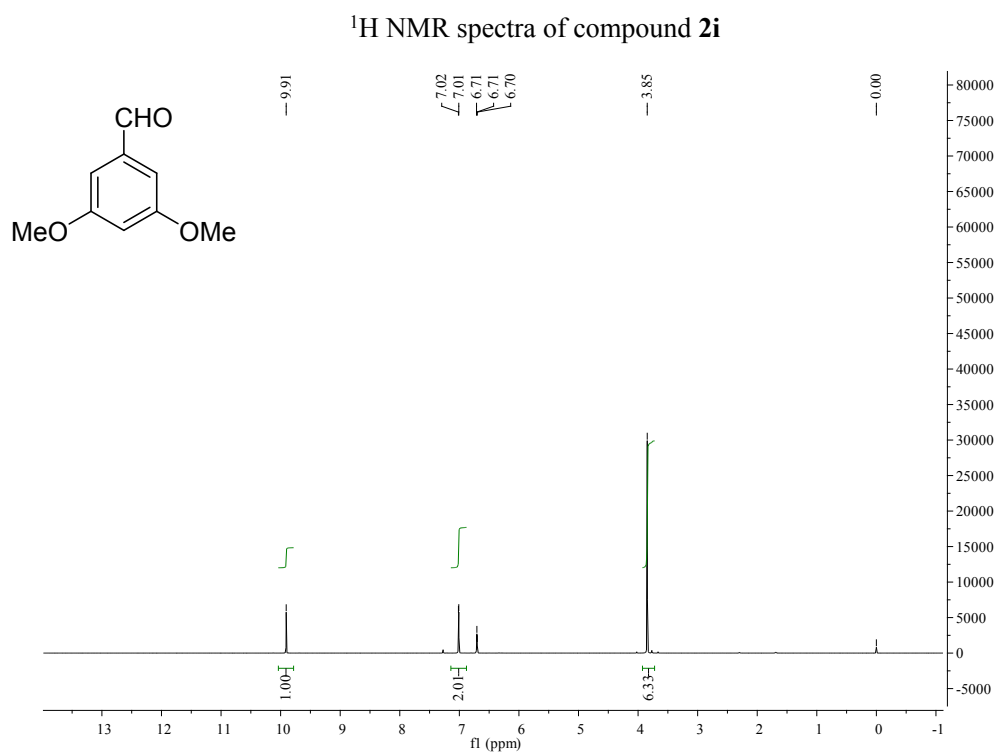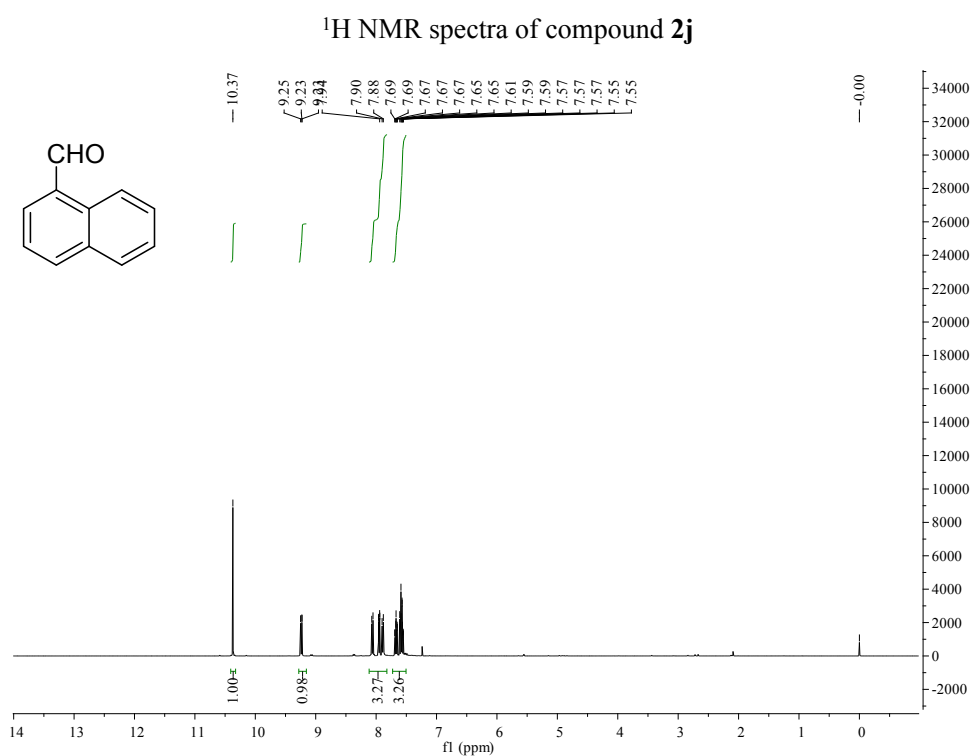

**Fig. S12** <sup>1</sup>H NMR spectra for the catalytic oxidation of benzyl alcohols into benzaldehydes (<sup>1</sup>H NMR).
